# Supplementary material for: The antitumor capacity of mesothelin-CAR-T cells in targeting solid tumors in mice
Source: PubMed Central journal article supplement — Mol Ther Oncolytics. 2021 Feb 24;20:556–68. doi: 10.1016/j.omto.2021.02.013 (PMC7943972; doi:10.1016/j.omto.2021.02.013), 2021-02-24
Supplement: mmc1.pdf [file mmc1.pdf]

OMTO, Volume 20

## **Supplemental information**

### **The antitumor capacity of mesothelin-CAR-T cells in targeting solid tumors in mice**

**Qian Zhang, Guoping Liu, Jibin Liu, Mu Yang, Juan Fu, Guodi Liu, Dehua Li, Zhangjie Gu, Linsong Zhang, Yingjiao Pan, Xingbing Cui, Lu Wang, Lixin Zhang, and Xiaoli Tian**

Fig S1

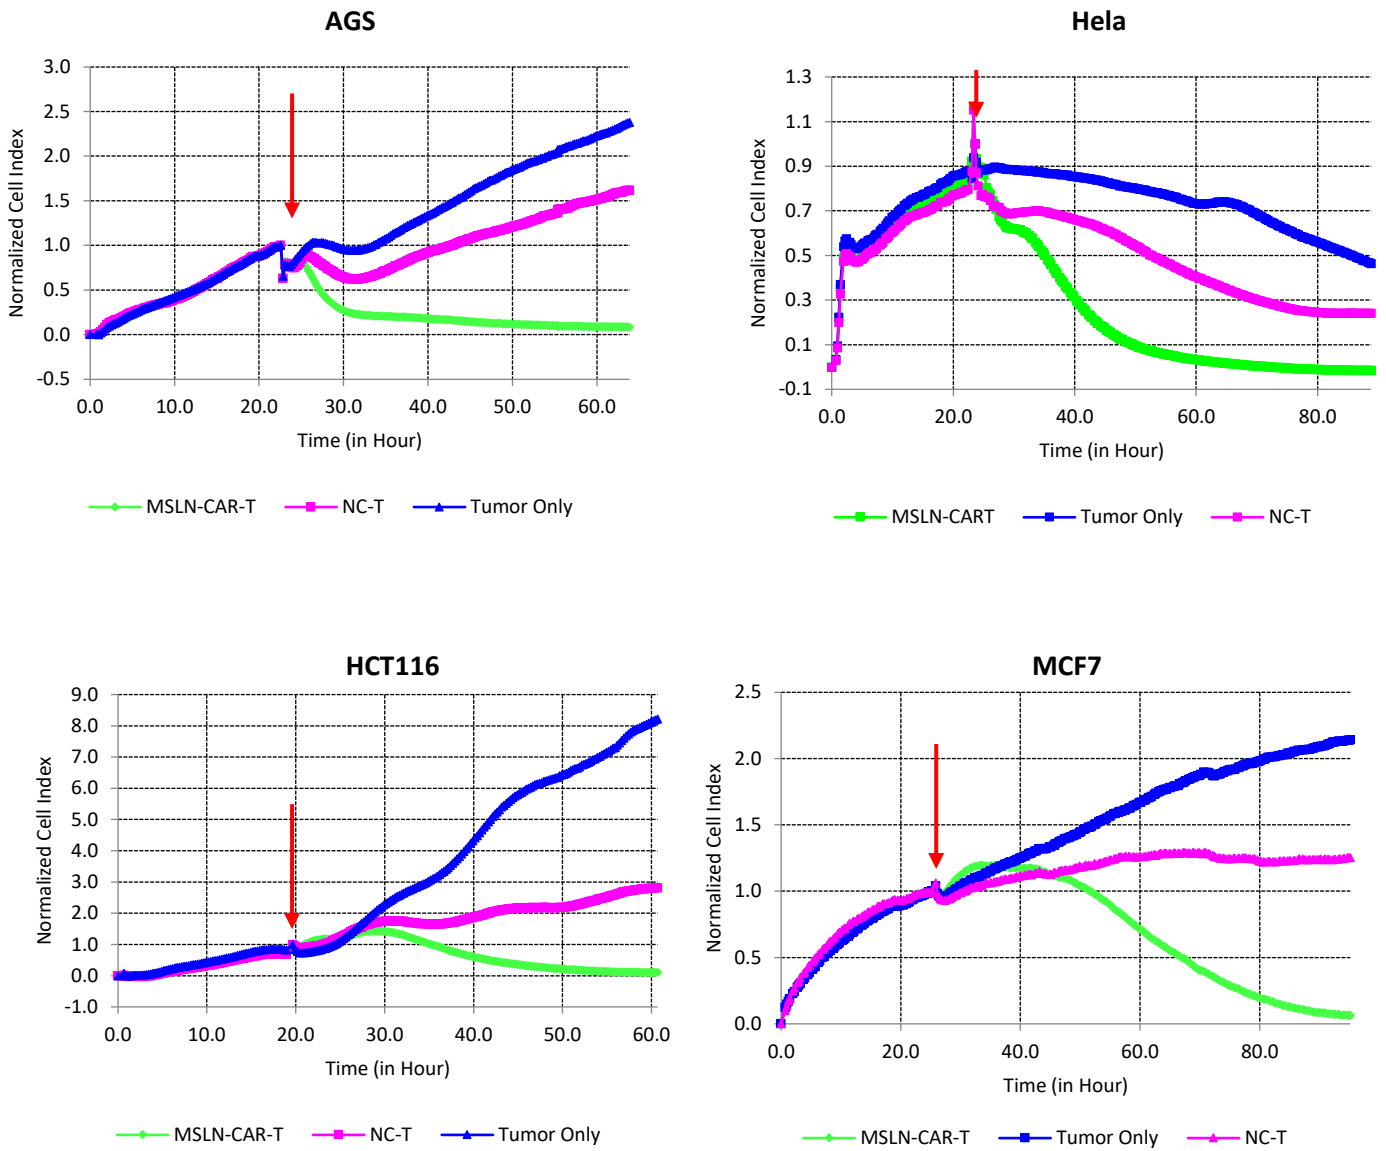

Supplemental Figure1. The cytotoxicity of MSLN-CAR-T cells against solid tumor cell lines was analyzed by RTCA assay. The red arrow represents the time point of effector cell addition.
